# Supplementary material for: Marine viruses disperse bidirectionally along the natural water cycle
Source: PubMed Central journal article supplement (PMC10564846; doi:10.1038/s41467-023-42125-5), 2023-10-10
Supplement: 41467_2023_42125_MOESM3_ESM.pdf [file 41467_2023_42125_MOESM3_ESM.pdf]

## **Description of Additional Supplementary Files**

**Title:** Supplementary Movie 1

**Description:** The supplementary video shows extended sea foam patches floating at the air-sea interface in the Swedish Skagerrak.

**Title:** Supplementary data 1

**Description:** Metagenome assembled genomes (MAGs) with assigned taxonomy and genomic characteristics

**Title:** Supplementary data 2

**Description:** GTDB-tk output

**Title:** Supplementary data 3

**Description:** Proportion of metagenome-assembled genome covered with reads at coverage=1 across different samples and ecosystems; threshold for "presence" of MAG is 0.9 as indicated by green

**Title:** Supplementary data 4

**Description:** Information on viral clusters (VC) defined by vConTACT2. Level, weight and accession are parameters determined by graphanalyzer (<https://github.com/lazzarigioele/graphanalyzer>)

**Title:** Supplementary data 5

**Description:** Single nucleotide polymorphism (SNP) analysis for Virus\_1 (see main Fig. 6) and associated mappings. SNP analysis performed in Geneious v11.1.5.

**Title:** Supplementary data 6

**Description:** Sampling times and volumes for air filtration; Sampled banks refer to handling filters as mentioned in the methods section of the main manuscript.

**Title:** Supplementary data 7

**Description:** Annotations for 109 viral scaffolds from rainwater provided by DRAM-v

**Title:** Supplementary data 8

**Description:** CRISPR arrays and consensus repeat sequence found on assemblies and MAGs using CRISPRcasFINDER (A), and spacer to protospacer hits after filtering at 80% similarity (B). In B, the array number is the first number behind "P" in the spacer name

**Title:** Supplementary data 9

**Description:** Field data for water sampling and notes, SML=surface microlayer, SSW=subsurface water

**Title:** Supplementary data 10

**Description:** Compiled information on precipitation samples, n.d.=not determined

**Title:** Supplementary data 11

**Description:** Accession numbers for metagenome-assembled genomes (MAGs) and raw data deposited in public databases

**Title:** Supplementary data 12

**Description:** Metagenome sample numbers

**Title:** Supplementary data 13

**Description:** Appendix of statistical data for Spearman rank correlation matrix of prokaryote data corresponding to Supplementary Figure 6

**Title:** Supplementary data 14

**Description:** Appendix of statistical data for Spearman rank correlation matrix of virus data corresponding to Supplementary Figure 6
